# Supplementary material for: RNA-TVcurve: a Web server for RNA secondary structure comparison based on a multi-scale similarity of its triple vector curve representation
Source: PubMed Central journal article supplement (PMC5251234; doi:10.1186/s12859-017-1481-7), 2017-01-21
Supplement: 12859_2017_1481_MOESM1_ESM.pdf [file 12859_2017_1481_MOESM1_ESM.pdf]

# A. Main Home page

RNA-TVcurve

Job ID...

**Retrieve results by Job ID**  
Home

Home  
Intro  
License  
About

TVCurve

Please choose one of following functions below: (Note: Only first sequence will be calculated on first two method)

TVCurve **1** RNA Mutation **2** RNA Multiple **3** RNA Pairwise **4**

**Four functional modules**

**Instruction**

Step 1: Input one or more RNA sequences or Choose File and click Upload  
Step 2: Click One of the methods  
Please note that only first sequence will be calculated on first two method

**Notice**

The minimal length of the input RNA sequence of RNA-TVcurve should be 10.

## B. Functional module 1: TVCurve

The screenshot shows the TVCurve web interface. At the top, there is a 'Home' header. Below it, the TVCurve logo is visible. A navigation bar contains buttons for 'TVCurve', 'RNA Mutation', 'RNA Multiple', and 'RNA Pairwise'. The 'TVCurve' button is highlighted with a blue arrow pointing to the text 'Visualization of RNA secondary structure'. Below the navigation bar, there is a section titled 'Please choose one of following functions below: (Note: Only first sequence will be calculated on first two method)'. Underneath, there is a list of three links: '1. Click here to load the RNA sequence and structure of Hepatitis C virus sample', '2. Click here to load the sequence of Leptomonas collosoma sample', and '3. Click here to load nine RNA virus sequences'. A red box highlights these links, with a blue arrow pointing to the text 'Tested examples'. Below the links, there is a text input field labeled 'Open RNA FASTA file...' with a blue arrow pointing to it from the text 'upload local files'. Below the input field, there is a large text area labeled 'FASTA sequences and optional structures here' with a blue arrow pointing to it from the text 'or submit in this text box'. To the right of this text area, there is a box titled 'Input: FASTA format' containing four bullet points: (i) a single RNA primary sequence and its secondary structure, (ii) or a set of RNA primary sequences and their structures, (iii) or primary sequences and part of structures, and (iv) or primary sequences alone. At the bottom left, there is a 'TVCurve' button with a blue arrow pointing to it from the text 'Execution button'.

Home

TVCurve

Please choose one of following functions below: (Note: Only first sequence will be calculated on first two method)

TVCurve RNA Mutation RNA Multiple RNA Pairwise

TVCurve Tab

You can open file or write content below:

1. Click here to load the RNA sequence and structure of *Hepatitis C virus* sample
2. Click here to load the sequence of *Leptomonas collosoma* sample
3. Click here to load nine RNA virus sequences

Open RNA FASTA file...

FASTA sequences and optional structures here

TVCurve

**Visualization of RNA secondary structure**

**Tested examples**

**upload local files**

**or submit in this text box**

**Input: FASTA format**

- (i) a single RNA primary sequence and its secondary structure
- (ii) or a set of RNA primary sequences and their structures
- (iii) or primary sequences and part of structures
- (iv) or primary sequences alone

**Execution button**

## C. Functional module 2: RNA Mutation

Detection of single-point mutation  
based on RNA secondary structure

TVCurve

Please choose one of following functions below: (Note: Only first sequence will be calculated on first two method)

TVCurve **RNA Mutation** RNA Multiple RNA Pairwise

RNA Mutation Tab

Compare with RNAdist and RNAdistance

You can open file or write content below:

1. Click [here](#) to load the sequence of *Leptomonas collosoma* sample

Open RNA FASTA file...

FASTA sequences and optional structures here

**Input: FASTA format**  
**(i) a single RNA primary sequence and its secondary structure**  
**(ii) or primary sequences alone**

RNA Mutation

## D. Functional module 3: RNA Multiple

**Construction of phylogenetic tree**

Please choose one of following functions below: (Note: Only first sequence will be calculated on first two method)

TVCurve RNA Mutation **RNA Multiple** RNA Pairwise

RNA Multiple Tab

Compare with RNAdist and RNAdistance

You can open file or write content below:

1. [Click here](#) to load 100 sequences of 4 non-coding RNA families
2. [Click here](#) to load nine RNA virus sequences
3. [Click here](#) to load another nine 5S rRNA sequences
4. [Click here](#) to load 18 RNase P and RNA Nase MRP sequences

Open RNA FASTA file...

FASTA sequences and optional structures here

**Input: FASTA format**

- (i) a set of RNA primary sequences and their structures
- (ii) or a set of primary sequences and part of structures
- (iii) or a set of primary sequences alone

RNA Multiple

**Option for comparing with RNAdistance and RNAdist**

**Tested examples**

## E. Functional module 4: RNA Pairwise

TVCurve

Please choose one of following functions below: (Note: Only first sequence will be calculated on first two method)

TVCurve RNA Mutation RNA Multiple **RNA Pairwise**

RNA Pairwise Tab

You can open file or write content below:

Open RNA FASTA file...

FASTA sequences and optional structures here

**Query input**

Open RNA FASTA file...

FASTA sequences and optional structures here

**Target input**

**RNA Pairwise**

**One to one structure comparison between target input and query input**

**FASTA format**

- (i) a single RNA primary sequence and its secondary structure
- (ii) or a set of RNA primary sequences and their structures
- (iii) or primary sequences and part of structures
- (iv) or primary sequences alone

**Same number of RNAs in query input and target input**
