# Supplementary material for: RNA-TVcurve: a Web server for RNA secondary structure comparison based on a multi-scale similarity of its triple vector curve representation
Source: PubMed Central journal article supplement (PMC5251234; doi:10.1186/s12859-017-1481-7), 2017-01-21
Supplement: 12859_2017_1481_MOESM3_ESM.pdf [file 12859_2017_1481_MOESM3_ESM.pdf]

# A. Select the example sequence and the operation button

Please choose one of following functions below: (Note: Only first sequence will be calculated on first two method)

TVCurve

RNA Mutation

RNA Multiple

RNA Pairwise

Step 1: Select functional module TVCurve

TVCurve Tab

Step 1

You can open file or write content below:

1. [Click here](#) to load the RNA sequence and structure of *Hepatitis C virus* sample
2. [Click here](#) to load the sequence of *Leptomonas collosoma* sample
3. [Click here](#) to load nine RNA virus sequences

Step 2

Step 2: Select the third example for visualization

Open RNA FASTA file...

```
>ALMV
AUGCUC AUGCAAAACUGCAUGAAUGCCCCUAAGGGAUGC
>CiLRV
AUGCCUAUAUUUUCUCUCCUGAGAAAAUAUAGAUGCCUCCAAAGGAGAUGC
>TSV
GUGCCAGUAGUAUAUAUAUACUACUGAUGCCUCCUUUAUAGGAGAUGC
>CVV
AUGCCCAAACUCUCUCUCAUGGAGAGAGAAUGGAUGCCUCCGAAGGAGAUGC
>APMV
AUGCCCACAACGUGAAGUUGUGGAUGCCCCGUUAGGGAAGC
```

TVCurve

Step 3

Step 3: Run TVCurve button

## B. Waiting interface: Job ID

Job ID: tv\_616c4ba72cee1e4f347f31f42ed4bfa42560ca60

Sequence and Structure

**Job ID**

```
>ALMV
AUGCUC AUGCAAAACUGCAUGA AUGCCCCUAAGGGAUGC
.... (((((((.....)))))).... ((.....))....
.....
```

Results

Please wait for a while. Alternatively, you can save the address of this page or the JobID to retrieve the results.

# C. Results of the module of TVCurve: results and download interface

Job ID: tv\_616c4ba72cee1e4f347f31f42ed4bfa42560ca60

## Sequence and Structure

```
>ALMV  
AUGCUC AUGCAAACUGCAUGAAUGCCCCUAAGGGAUGC  
... ((((((.....))))))... (((.....)))....  
.....
```

## Results

[Download .zip file](#)

**Download files**

Sequence #001

Sequence #002

Sequence #003

Sequence #004

**Result for each RNA**

Sequence #005

Sequence #006

Sequence #007

Sequence #008

Sequence #009

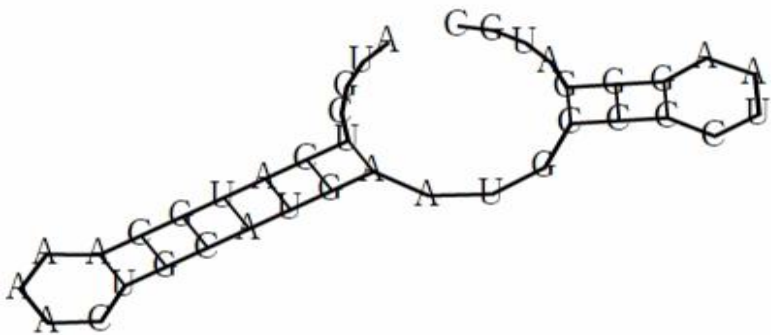

DRNA structure

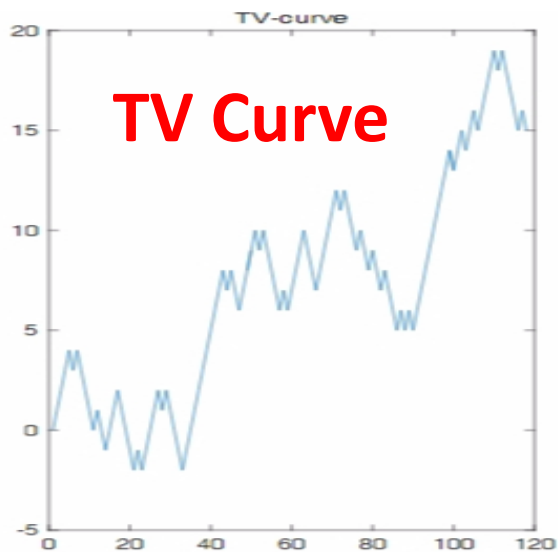

TV Curve

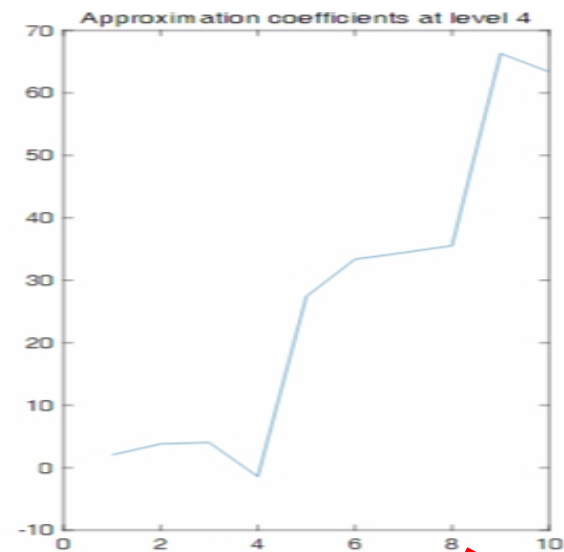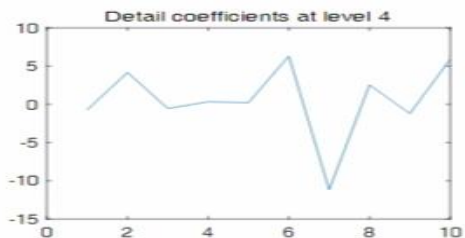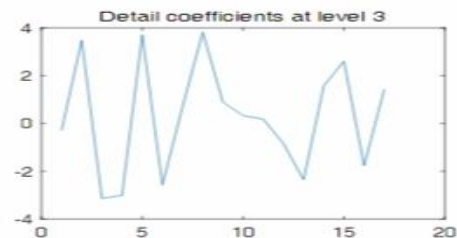

Approximation signal of wavelet decomposition

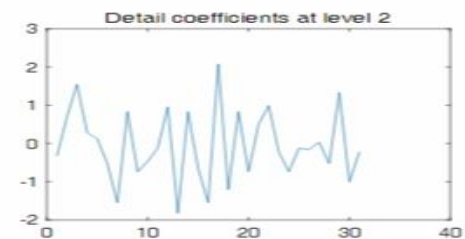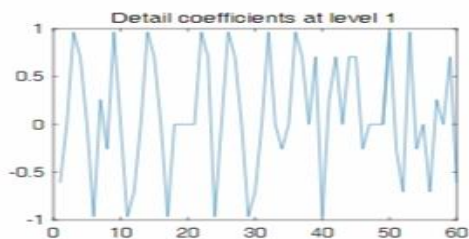

2 Detailed signals of wavelet-decomposition

Multi-resolution TV Curve

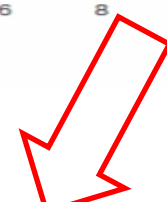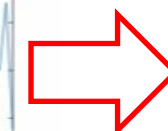

```
> ALMV
AUGCUCUAUGCAAAACUGCAUGAAUGOCOCUAAGGGAUGC
.... ((((((.....))))))... (((.....)))....
```
