# Supplementary material for: RNA-TVcurve: a Web server for RNA secondary structure comparison based on a multi-scale similarity of its triple vector curve representation
Source: PubMed Central journal article supplement (PMC5251234; doi:10.1186/s12859-017-1481-7), 2017-01-21
Supplement: 12859_2017_1481_MOESM4_ESM.pdf [file 12859_2017_1481_MOESM4_ESM.pdf]

# A. Select the example sequence and the operation button

Please choose one of following functions below: (Note: Only first sequence will be calculated on first two method)

TVCurve

**RNA Mutation**

RNA Multiple

RNA Pairwise

RNA Mutation Tab

Compare with RNApdist and RNApdistance

You can open file or write content below:

1. [Click here](#) to load the sequence of *Leptomonas collosoma* sample

Open RNA FASTA file...

```
>Lep  
AACTAAAACAATTTTGAAGAACAGTTCTGTACTTCATTGGTATGTAGAGACTTC
```

RNA Mutation

Step 1

Step 1: Select functional module RNA Mutation

Step 2

Step 2: Select the example

Step 3

Step 3: Run RNA Mutation button

## B. Waiting interface: Job ID

Job ID:

mutation\_8a720914e775402900968c2e5296c2f71a14fbf9

Sequence and Structure

**Job ID**

```
>Lep
AACTUAAAACAAUUUUUG AAGAACAGUUUCUGUACUUCAUUGGUAUGUAGAGACTUUC
.. ((... ((((((. ((((( ((((...)))..)))))..)))).))).....
```

Results

Please wait for a while. Alternatively, you can save the address of this page or the JobID to retrieve the results.

# C. Results of the module of RNA Mutation: results and download interface

Job ID: mutation\_8a720914e775402900968c2e5296c2f71a14fbf9

Sequecne and Structure

```
>Lep  
AACTUAAAACAUAUUUUUG AAGAACAGUUCUG UACUUC AUUG GUAUGUAGAG ACUUC  
..... (((((( (. (((((( (((((...)))).)))).)).....
```

Results

Download .zip file

Download files

Deleterious profile

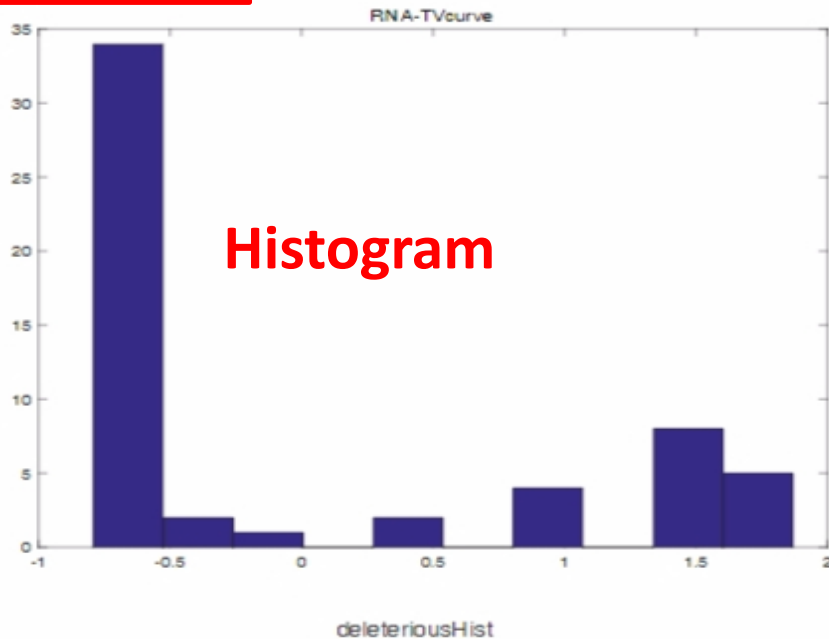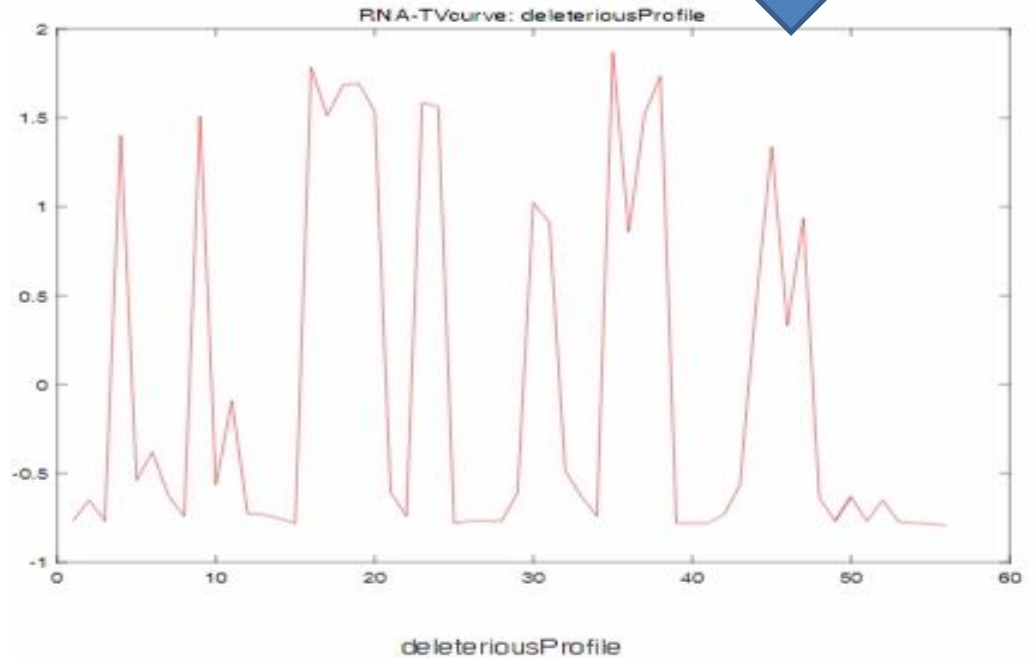

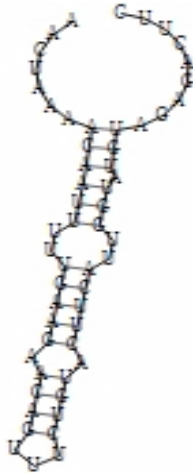

Original

## Original RNA structure

```

AACUAAAACA AUUUUUUGAAGAACAAGUUCUGUACUUC AUUGGUAUGUAGAGACUUC
..... (((((( (. ((((( ( ((((. . . . . ))) . . . . . ))) . . . . . ))) . . . . . ))) . . . . . ( -9.40)
  
```

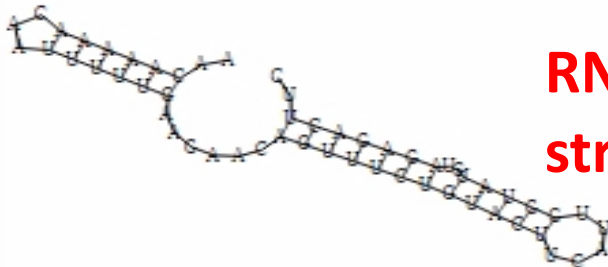

## RNA U4A mutant with the maximum structure distance

RNA-TVcurve\_U4A

```

AACAAAAACA AUUUUUUGAAGAACAAGUUCUGUACUUC AUUGGUAUGUAGAGACUUC
.. (((((( (. . . . . ))) . . . . . ((((((((((( (. . . . . ))) . . . . . ))) . . . . . ))) . . . . . ( -10.10)
  
```
