# Supplementary material for: RNA-TVcurve: a Web server for RNA secondary structure comparison based on a multi-scale similarity of its triple vector curve representation
Source: PubMed Central journal article supplement (PMC5251234; doi:10.1186/s12859-017-1481-7), 2017-01-21
Supplement: 12859_2017_1481_MOESM5_ESM.pdf [file 12859_2017_1481_MOESM5_ESM.pdf]

# A. Select the example sequence and the operation button

Please choose one of following functions below: (Note: Only first sequence will be calculated on first two method)

TVCurve

RNA Mutation

**RNA Multiple**

RNA Pairwise

Step 1

Step 1: Select functional module

RNA Multiple Tab

Compare with RNApdist and RNAdistance

Step 2

Step 2: Select to compare with RNApdist and RNAdistance

You can open file or write content below:

1. [Click here](#) to load 100 sequences of 4 non-coding RNA families
2. [Click here](#) to load nine RNA virus sequences
3. [Click here](#) to load another nine 5S rRNA sequences
4. [Click here](#) to load 18 RNase P and RNA Nase MRP sequences

Step 3

Step 3: Select the first example

Open RNA FASTA file...

```
>tRNA_IJ48228_1/7-166  
CAAUCUUAACG AUG GAUGUCUUGG UUCCUAUAGCGAUGAAGGCCGCAGCAAAGUGG AUUUGCAAUG AAA  
AAUGCAAUUACUGUGAAUCAUCAG AAUGCUG AAUGUAAACTUAUACCAU&UJUACOCUUAUGGCC AAAUUA  
ACGUGGUAUUCUACAG AAA
```

```
>tRNA_IJ21939_1/68-218  
CAGUCUUAACG AUG GAUGUCUUGG UUCCUAC AGCGAUGAAGGCCGCAGCAA AUGG AUACGCAAUG AAA  
AUUGCAGUGACUGUGAAUCAUCAG AAUGCUG AAUGUAACTUACACCAAUUCUUGGGGAAUAGUGGUAC  
UUCUACAGAAA
```

RNA Multiple

Step 4

Step 3: Run RNA Multiple button

## B. Waiting interface: Job ID

Job ID: multiplep\_d0fd5247a070b054bd10574b2bb844473b4256ca

Sequence and Structure

**Job ID**

>tRNA\_U48228.1/7-166

```
CAAUCUUAACG AUG GAUGUCUUG UUC CUAUAGCG AUG AAGGCCG CAGCAAAGUGCG AUUAUGCAAUG AAAAAUG CAAUUACUGUG AAUCAUCAG AAUGCUG AAUGUAAACUAUACCAUAUUUACCCUUAUG GGC AAAUUAACGUGGU AUUCUACAGA  
AA
```

Results

Please wait for a while. Alternatively, you can save the address of this page or the JobID to retrieve the results.

# C. Results of the module of RNA Multiple: results and download interface

Job ID: multiplep\_d0fd5247a070b054bd10574b2bb844473b4256ca

```
Sequece and Structure  
  
>tRNA_U48228.1/7-166  
CAATCUUAAACG AUG GAUGUCUUGG UUCUUAUAGCGAUGAAGGCCGACGAAAGFUGOG AUAUGCAADG AAAAAUG CAAUUAUGGAAUACAUCAG AAUUGCTUG AAUGUA.AACUUAUACCAUUAUUAACCUUADG GGC AAAUUAACGUGGUAUUCUACAG A  
AA
```

Results

[Download .zip file](#) **Download files**

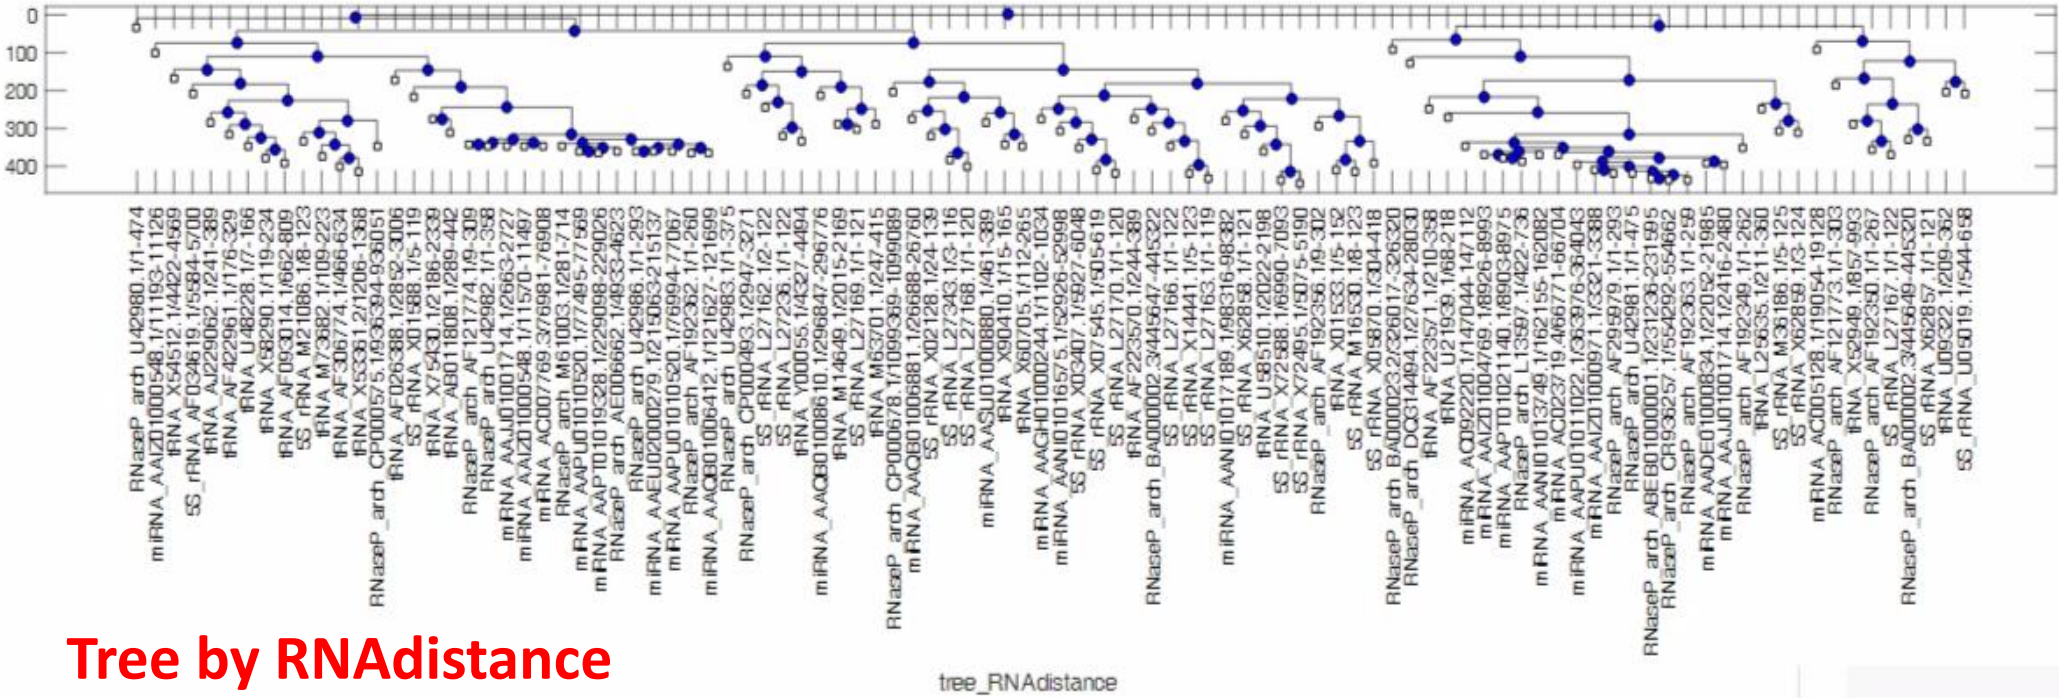

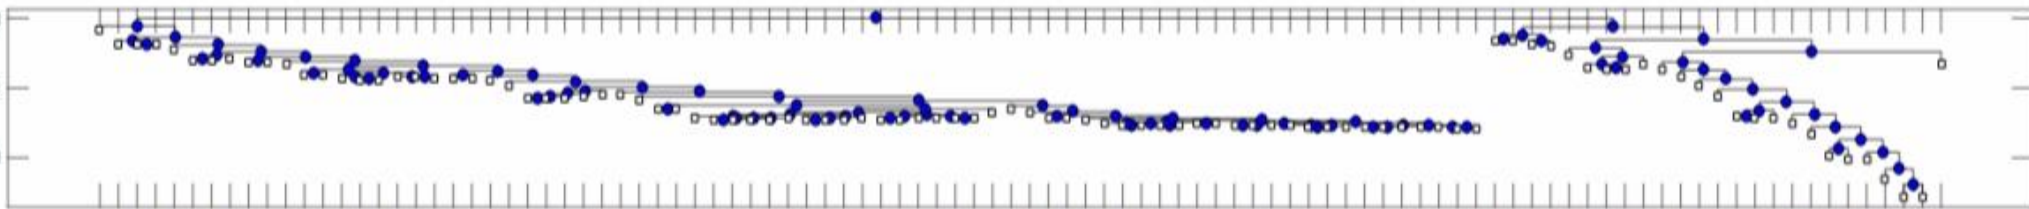

## Tree by RNAdistance

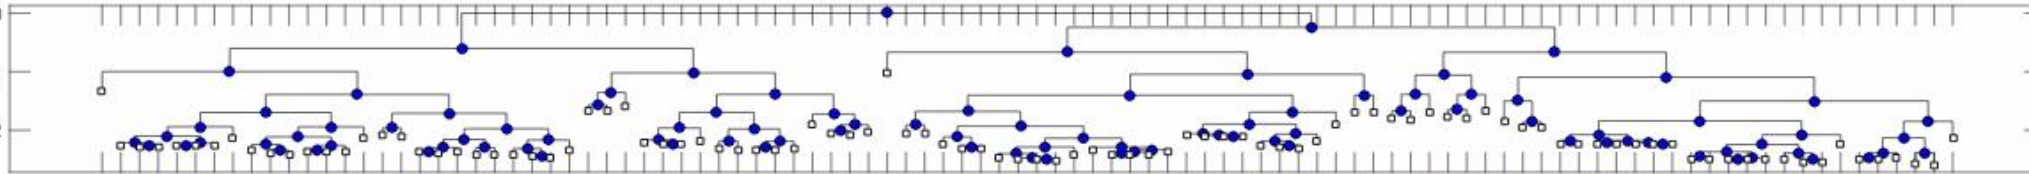

## Tree by RNA-TVcurve

Tree\_RNATVcurve
