# Supplementary material for: RNA-TVcurve: a Web server for RNA secondary structure comparison based on a multi-scale similarity of its triple vector curve representation
Source: PubMed Central journal article supplement (PMC5251234; doi:10.1186/s12859-017-1481-7), 2017-01-21
Supplement: 12859_2017_1481_MOESM6_ESM.pdf [file 12859_2017_1481_MOESM6_ESM.pdf]

# The first pair comparison :ALMV vs ALMV

Sequence #001

The distance score between "ALMV" and "ALMV":  
0.000000

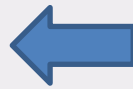

**Distance score= 0**

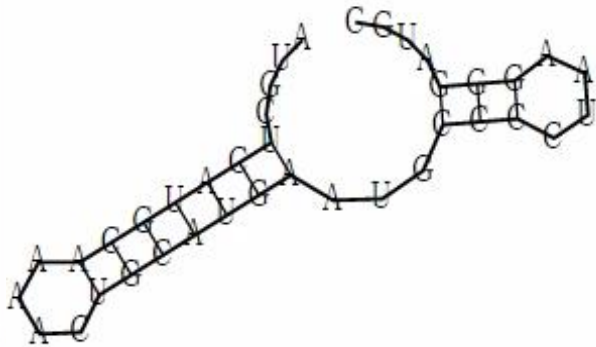

**Structure**

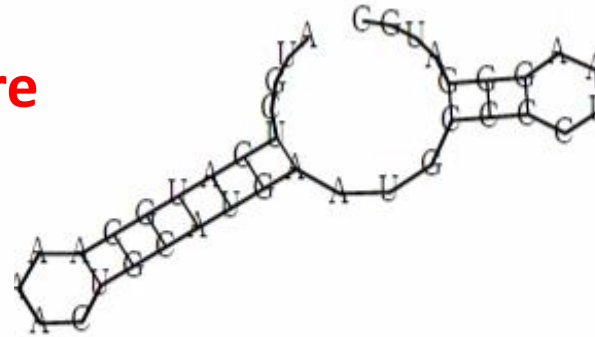

RNA-Structure-1

ALMV

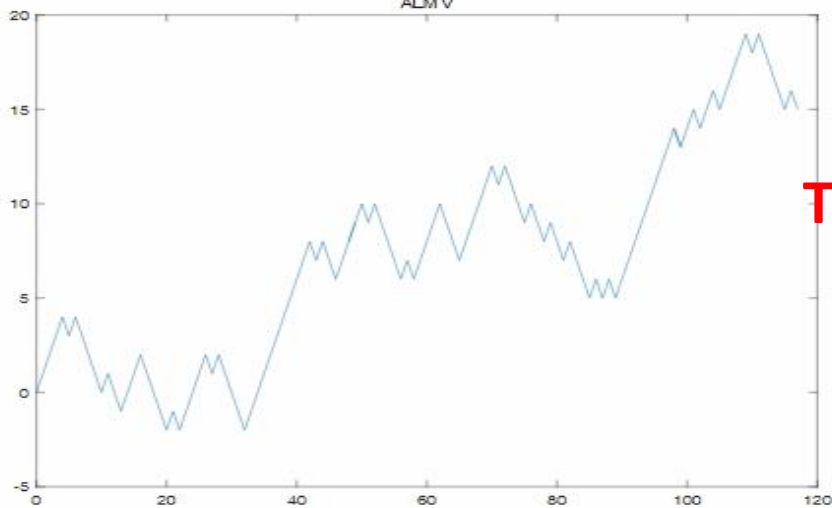

RNA-TVcurve-1

RNA-Structure-2

ALMV

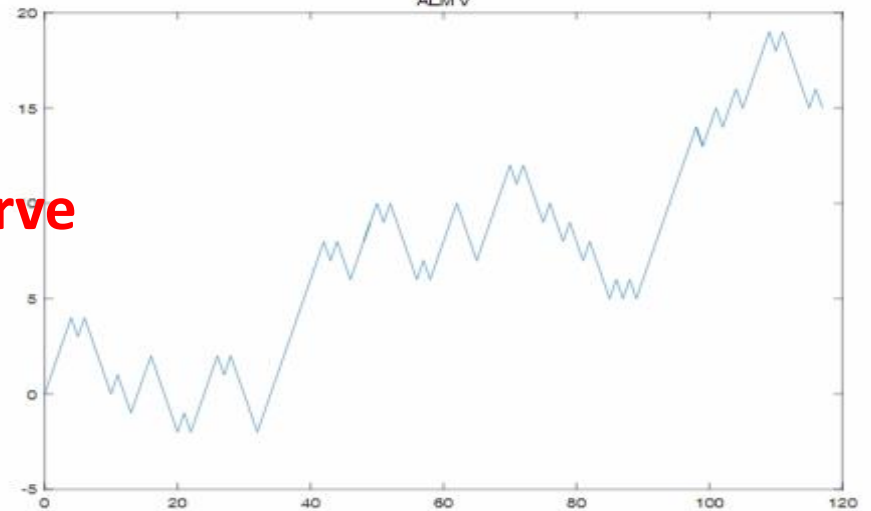

RNA-TVcurve-2

**TV curve**

Sequence #003

## The third pair comparison :TSV vs LRMV

The distance score between "TSV" and "LRMV":  
0.835016

← **Distance score=0.835016**

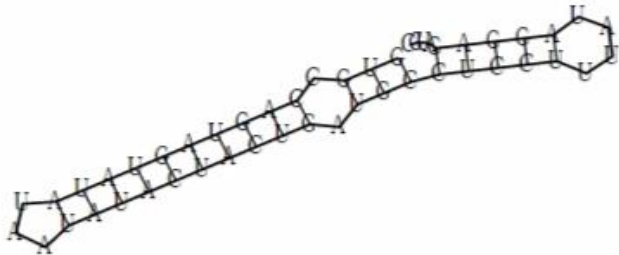

**Structure**

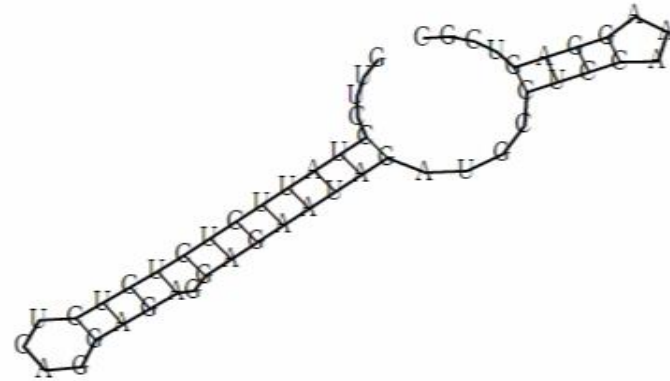

RNA-Structure-1

TSV

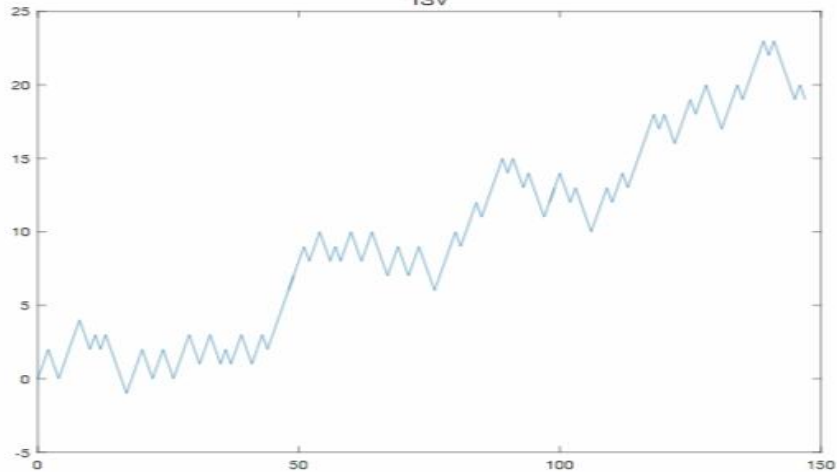

RNA-TVcurve-1

RNA-Structure-2

LRMV

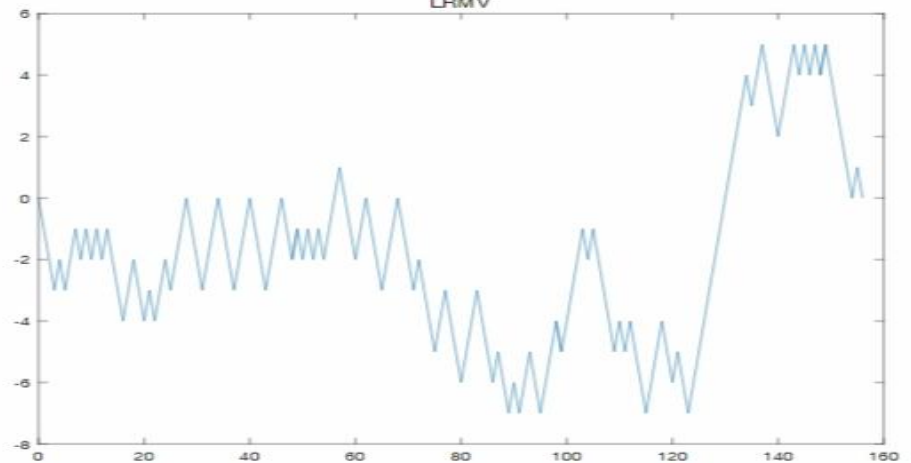

RNA-TVcurve-2

**TV curve**
